# Supplementary material
Source: Royal Society of Chemistry journal article supplement (doi:10.1039/d6sd00063k)
Supplement: d6sd00063k2.pdf [file d6sd00063k2.pdf]

1

2

3

4

A

A

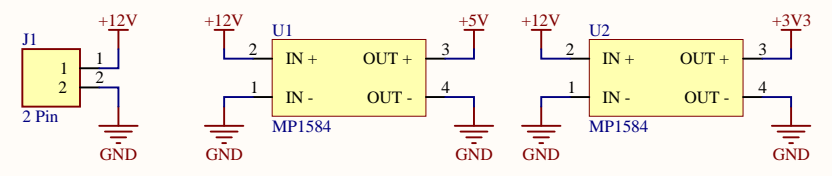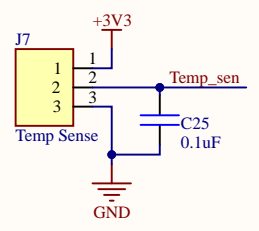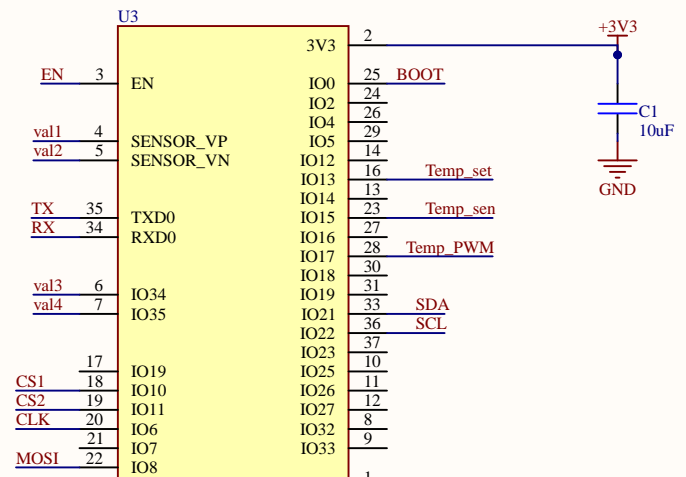

B

B

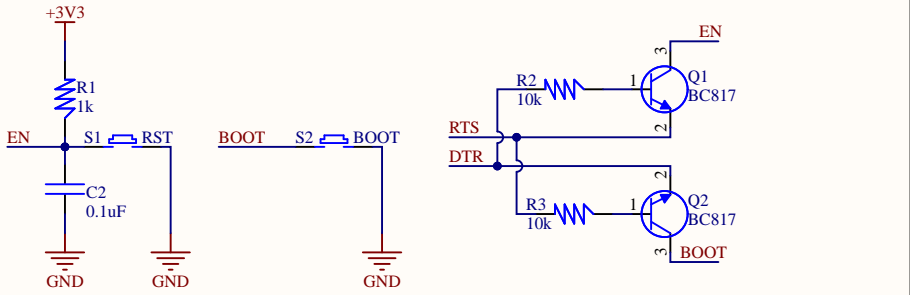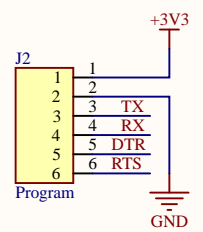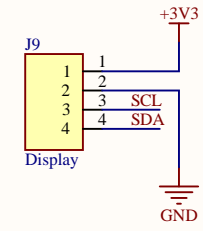

C

C

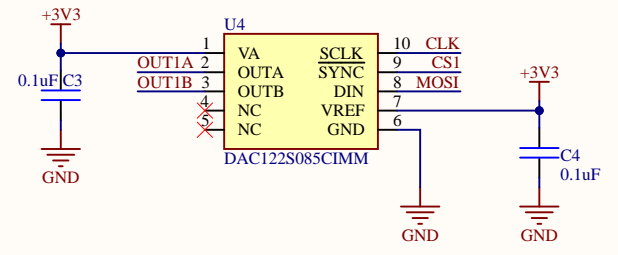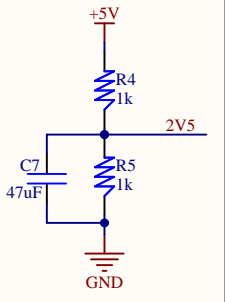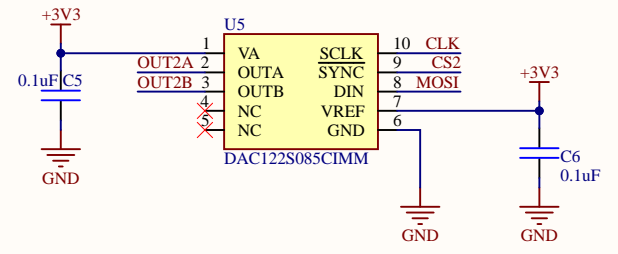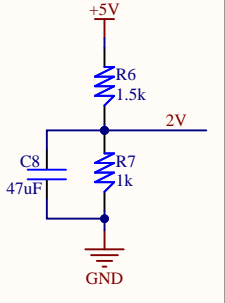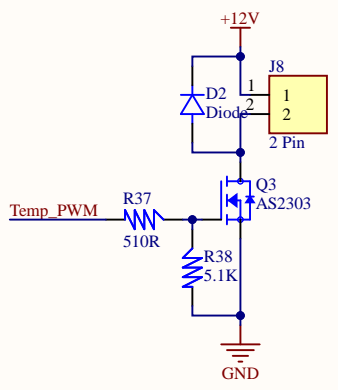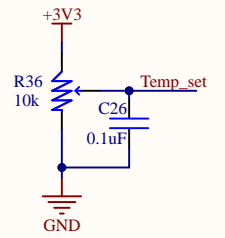

D

D

|       |                                               |          |
|-------|-----------------------------------------------|----------|
| Title |                                               |          |
| Size  | Number                                        | Revision |
| A4    |                                               |          |
| Date: | 5-05-2025                                     | Sheet of |
| File: | D:\Freelancing\..\Potentiostat[1]_v1.0.SchDoc |          |
|       | Drawn By:                                     |          |

1

2

3

4

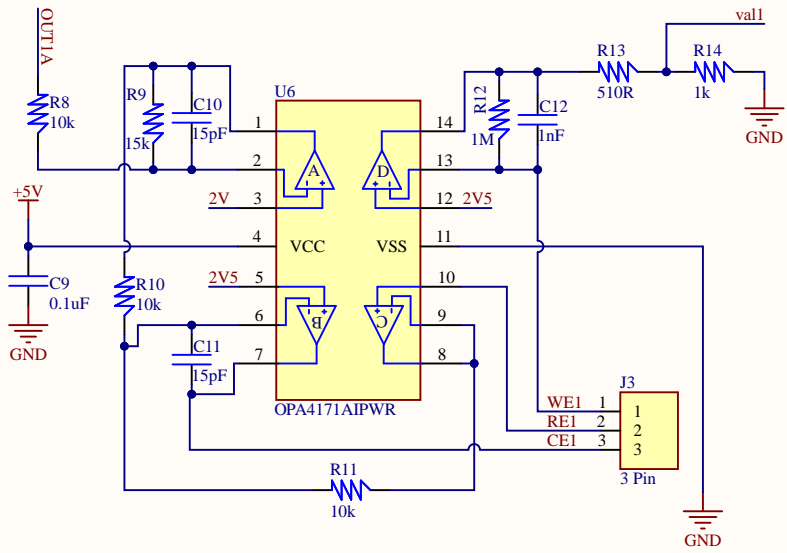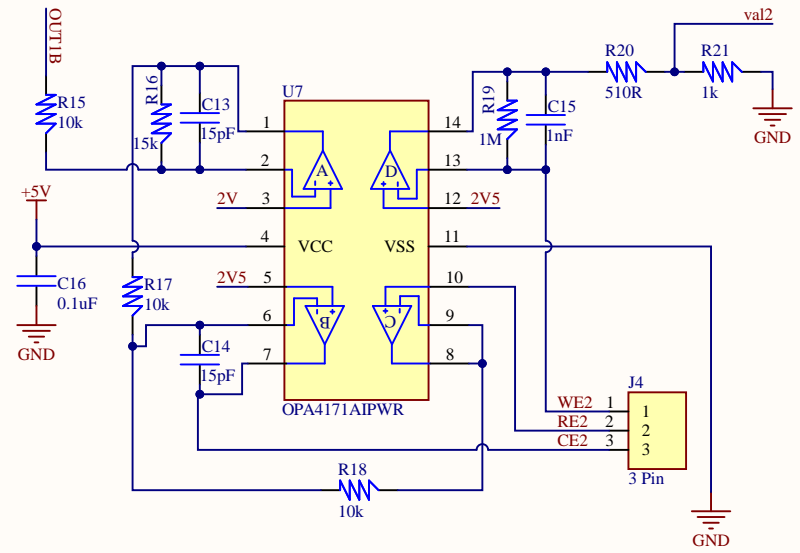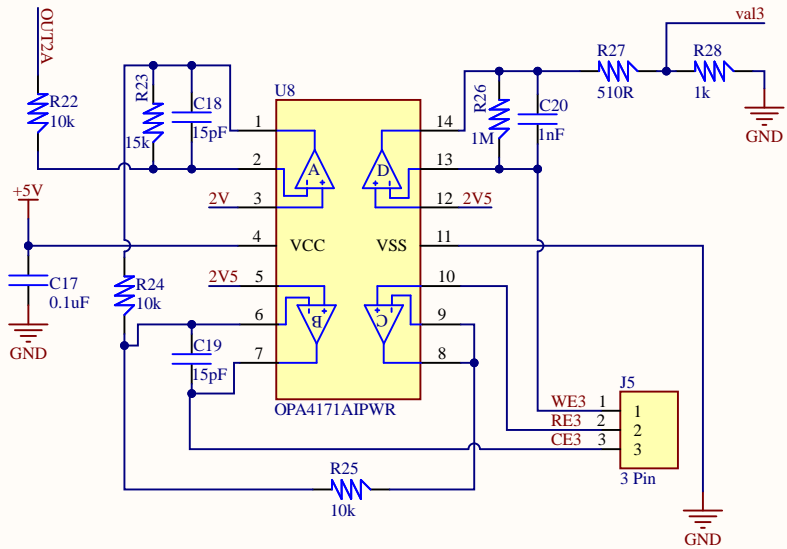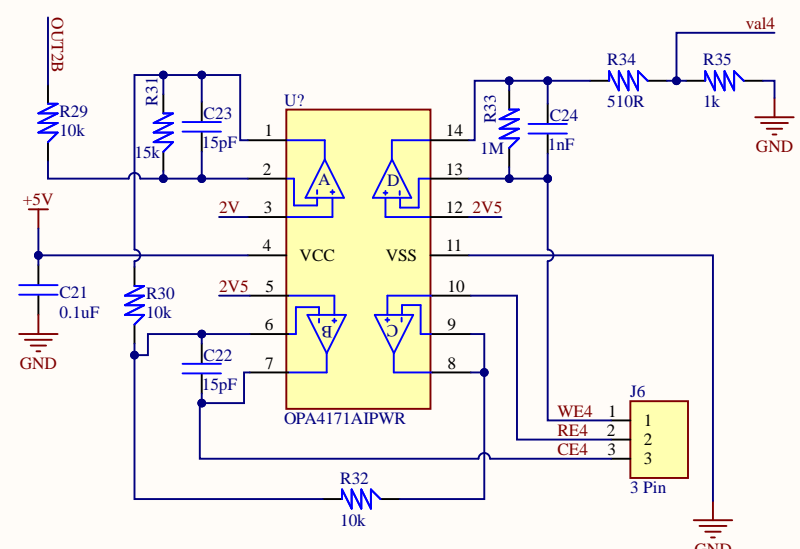

| Title |                                            |           |
|-------|--------------------------------------------|-----------|
| Size  | Number                                     | Revision  |
| A4    |                                            |           |
| Date: | 5-05-2025                                  | Sheet of  |
| File: | D:\Freelancing\..\Potentiostat[2]_v1.0.Sch | Drawn By: |
